# Supplementary material for: Peripheral Organs of Dengue Fatal Cases Present Strong Pro-Inflammatory Response with Participation of IFN-Gamma-, TNF-Alpha- and RANTES-Producing Cells
Source: PLoS One. 2016 Dec 22;11(12):e0168973. doi: 10.1371/journal.pone.0168973 (PMC5179082; doi:10.1371/journal.pone.0168973)
Supplement: S1 Table — (XLSX) [file pone.0168973.s004.xlsx]

## Sheet: Plan1
	Liver			Lung			Kidney
	DENV*	control*	p value**	DENV	control	p value	DENV	control	p value
CD4	2.2	1.68	0.0286	4.4	1.24	0.0294	1.06	0.2	0.0286
	6.54	0.22		3.2	0.4		1.54	0.5
	3.46	0.56		2.02	0.4		1.12	0.42
	1.72	0.24		2.58	0.6		0.82	0.26
CD8	1.4	0.3	0.0286	2.96	0.46	0.0286	0.72	0.48	0.1143
	2.2	0.7		1.54	0.7		0.36	0.26
	2	0.9		0.76	0.3		1.54	0.14
	1.7	0.45		3.34	0.66		0.8	0.5
CD68	6.5	4.1	0.6857	6.94	4.6	0.2	5.2	1.04	0.0286
	3.1	5.9		17.94	4.78		13.34	0.88
	9.2	7.9		3.9	5		1.78	0.8
	10.1	6.8		8.14	2.54		6.4	0.5
TNF-a	4.6	0.95	0.0286	4.6	0	0.0286	2.84	1.28	0.0286
	2	0.4		6.96	0.5		1.3	0.74
	2.3	0.8		2.64	0.75		1.66	0.48
	1	0.35		5.3	0.9		2.6	0.26
IFN-g	2	0.3	0.0294	5.08	0	0.0286	1.46	0.88	0.0286
	1.4	0.3		20.68	0.8		5.1	0.9
	1.3	0.6		4.84	0.9		2.62	0.22
	2.9	0.45		8.86	1.9		3.64	0.48
TGF-b	3.1	1.2	0.0571	2.76	0	0.0286	2.16	1.52	0.0286
	1.3	1.4		3.04	1		2.78	1
	1.5	1		3.92	0.58		2.38	0.44
	2.3	0.65		6.08	1.9		1.94	0.6
IL-10	4.5	3.8	0.3429	7.02	0.5	0.0286	1.96	0.9	0.0286
	2.9	1.8		8.22	0.52		2.68	1
	1.5	1.6		2.4	0.44		3.8	0.92
	4.5	0.75		5.86	1.1		1.98	0.38
RANTES	2.1	0.8	0.0286	6.96	1.94	0.0286	5.5	0.46	0.0286
	4.4	0.6		8.48	0.9		11.06	0.4
	1.52	0.4		5.48	0.5		1.14	0.5
	1.52	1.5		9.38	0.7		2.66	0.2
*Values are expressed as the median of positive cells/0.95 mm2 considering 50 analyzed fields
**p value were calculated using Mann-Whitney statistical test considering 95% of confidence interval
